# Supplementary material for: Controllable drug release system based on phase change molecules as gatekeepers for bimodal tumor therapy with enhanced efficacy
Source: Royal Society of Chemistry journal article supplement (doi:10.1039/c6ra10736b), 2016-01-01
Supplement: c6ra10736b1.pdf [file c6ra10736b1.pdf]

## Supporting Information

### Controllable Drug Release System based on phase change molecules as gatekeepers for Bimodal Tumor Therapy with Enhanced Efficacy

Fei He,<sup>a,b</sup> Yinyin Chen,<sup>a,b</sup> Chunxia Li,<sup>a,\*</sup> Xiaoran Deng,<sup>a,b</sup> Bin Liu,<sup>a</sup> Bei Liu,<sup>a,b</sup> Shanshan Huang,<sup>a</sup> Zhiyao Hou,<sup>a</sup> Ziyong Cheng<sup>a</sup> and Jun Lin<sup>a,\*</sup>

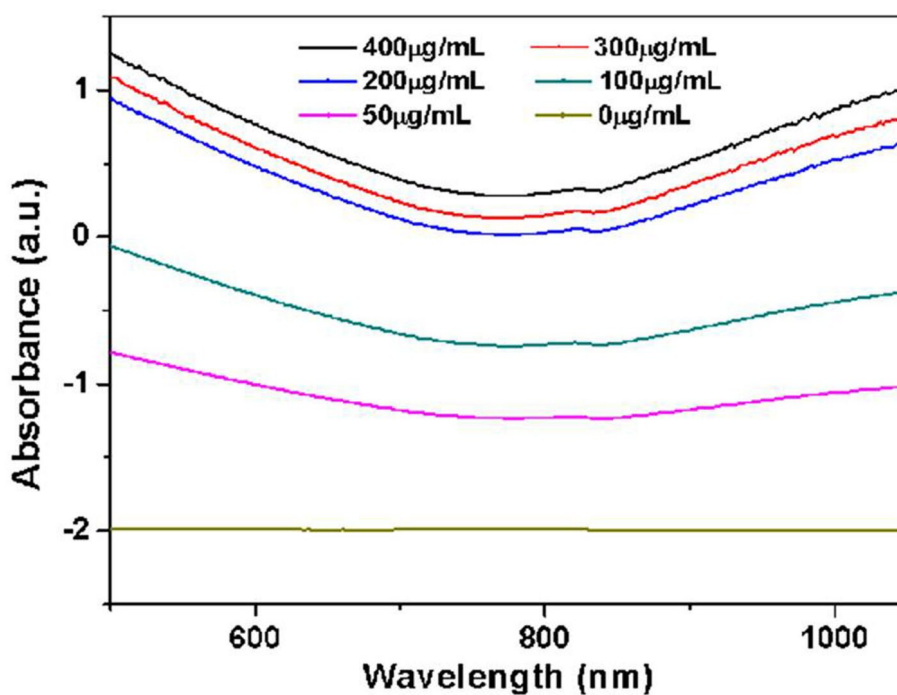

**Fig S1.** The UV-Vis-NIR absorption spectra of Cu<sub>9</sub>S<sub>5</sub>@mSiO<sub>2</sub>-PEG.

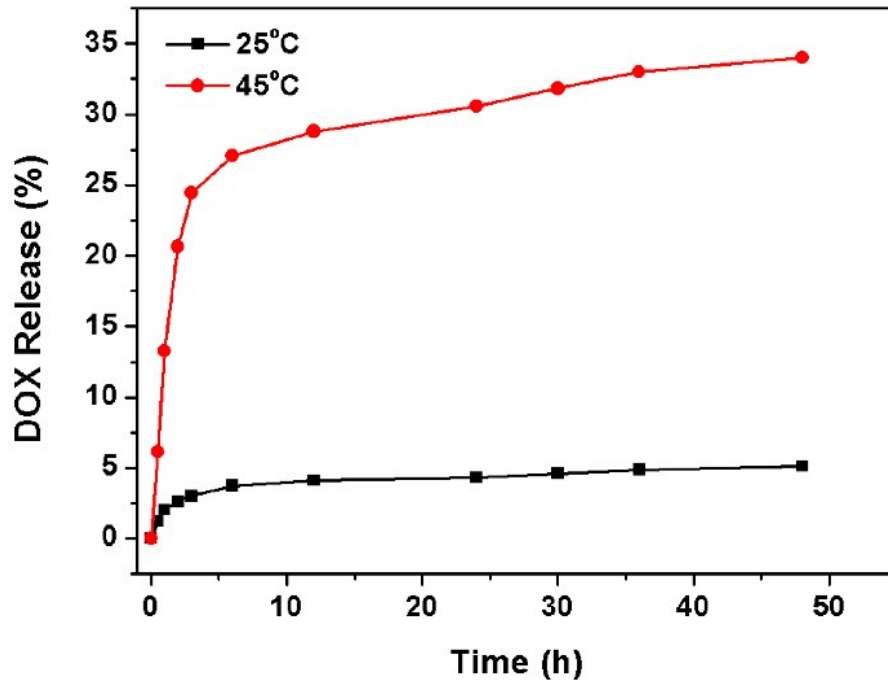

**Fig S2.** DOX cumulative release from  $\text{Cu}_9\text{S}_5@\text{mSiO}_2\text{-PEG@DOX@TD}$  core-shell nanoparticles in phosphate-buffer saline (pH=5.0) at different temperatures (T=25 °C and 45 °C).

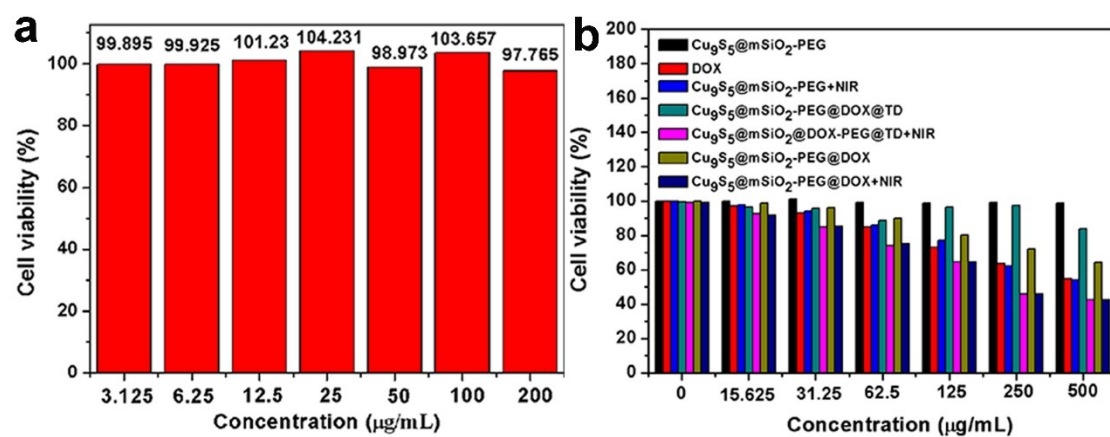

**Fig S3.** (a) Cell viability of HeLa cells after incubation with  $\text{Cu}_9\text{S}_5@\text{mSiO}_2\text{-PEG}$  for 24 h by using MTT assay; (b) The cell inhibition rate of DOX,  $\text{Cu}_9\text{S}_5@\text{mSiO}_2\text{-PEG}$ ,  $\text{Cu}_9\text{S}_5@\text{mSiO}_2\text{-PEG@DOX}$  and  $\text{Cu}_9\text{S}_5@\text{mSiO}_2\text{-PEG @ DOX@TD}$  incubated with HeLa cells versus the  $\text{Cu}_9\text{S}_5@\text{mSiO}_2$  concentration. Some groups were exposed to 980 nm laser ( $0.5 \text{ W/cm}^2$ ) for 5 min.

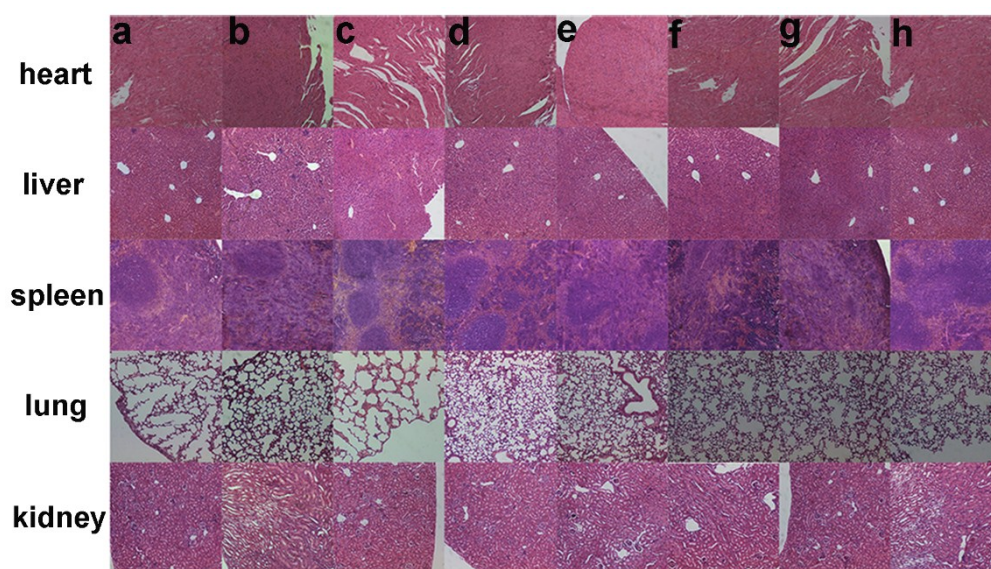

**Fig S4.** Hmatoxylin and Eosin (H&E) stained images of organs of the groups (a)  $\text{Cu}_9\text{S}_5@\text{mSiO}_2\text{-PEG@DOX@TD} + \text{NIR}$ , (b) DOX, (c)  $\text{Cu}_9\text{S}_5@\text{mSiO}_2\text{-PEG} + \text{NIR}$ , (d)  $\text{Cu}_9\text{S}_5@\text{mSiO}_2\text{-PEG@DOX@TD}$ , (e)  $\text{Cu}_9\text{S}_5@\text{mSiO}_2\text{-PEG}$ , (f) control, (g)  $\text{Cu}_9\text{S}_5@\text{mSiO}_2\text{-PEG@DOX}$  and (h)  $\text{Cu}_9\text{S}_5@\text{mSiO}_2\text{-PEG @DOX} + \text{NIR}$ , respectively.
